# Supplementary material
Source: MDPI journal article supplement (https://www.mdpi.com/1424-2818/15/4/527)
Supplement: s1 [file s1]

## Supplementary materials

**Table S1.** The genotypes and phenotypes of the *K. pneumoniae* isolates used in this study.

| Strain   | Source                                | <i>entb</i> | <i>fimh</i> | <i>mrkd</i> | <i>ybtA</i> | Resistance to Antibiotic | Tolerance to Heavy Metal | 16S rRNA Gene<br>(GenBank Accession No.) |
|----------|---------------------------------------|-------------|-------------|-------------|-------------|--------------------------|--------------------------|------------------------------------------|
| 7-5-4    | <i>Misgurnus<br/>anguillicaudatus</i> | +           | +           | +           | –           | CHL/CIP/KAN/NOR/SXT/TET  | Cr/Pb/Cu/Zn/Hg           | OM816745                                 |
| 7-10-14  | <i>Maoetra veneriformis</i>           | +           | –           | –           | –           | AMP/CHL/GEN/KAN/SXT/TET  | Cr/Pb/Cu/Zn/Hg           | OM816746                                 |
| 7-13-2   | <i>Eriocheir sinensis</i>             | +           | +           | +           | –           | AMP                      | Cr/Pb/Cu/Mn/Zn           | OM816747                                 |
| 7-17-8   | <i>Cipangopaludina<br/>cahayensis</i> | +           | +           | +           | +           | AMP                      | Cr/Cu/Zn                 | OM816748                                 |
| 8-1-12-1 | <i>Procambarus clarkii</i>            | +           | +           | +           | +           | AMP                      | Cd/Cr/Pb/Cu/Mn/Zn/Hg     | OM816750                                 |
| 8-2-5-4  | <i>Tegillarca granosa</i>             | +           | +           | +           | –           | AMP/CHL/TET              | Cr/Pb/Cu/Zn/Hg           | OM816752                                 |
| 8-2-10-5 | <i>Epinephelus fuscoguttatus</i>      | +           | +           | +           | –           | CHL/CIP/KAN/SXT/TET      | Cd/Cr/Pb/Cu/Zn/Hg        | OM816753                                 |

Note: AMP, ampicillin; CHL, Chloroamphenicol; KAN, Kanamycin; GEN, Gentamicin; SXT, Sulphamethoxazole-trimethoprim; TET, Tetracycline; NOR, Norfloxacin; CIP, Ciprofloxacin

**Table S2.** The oligonucleotide primers used in this study.

| Target Gene       | Primer               | Sequence (5' to 3')         | Predicted Size (bp) | Reference |
|-------------------|----------------------|-----------------------------|---------------------|-----------|
| 16S rDNA          | 27-F                 | AGAGTTTGATCCTGGCTCAG        | 1540                | [110]     |
|                   | 1492-R               | TACGGCTACCTTGTACGAC         |                     |           |
| <i>aerobactin</i> | <i>aerobactin</i> -F | GTGCTGTCGATGAGCGATGC        | 944                 | [111]     |
|                   | <i>aerobactin</i> -R | GTGAGCCAGGTTTCAGCGTC        |                     |           |
| <i>wcaG</i>       | <i>wcaG</i> -F       | GGTTGGTCAGCAATCGTA          | 169                 | [112]     |
|                   | <i>wcaG</i> -R       | ACTATTCGCCCAACTTTTGC        |                     |           |
| <i>traT</i>       | <i>traT</i> -F       | GGTGTGGTGCGATGAGCACAG       | 290                 | [109]     |
|                   | <i>traT</i> -R       | CACGGTTCAGCCATCCCTGAG       |                     |           |
| <i>iroN</i>       | <i>iroN</i> -F       | AAGTCAAAGCAGGGGTGCCCCG      | 665                 | [112]     |
|                   | <i>iroN</i> -R       | GACGCCGACATTAAGACGCAG       |                     |           |
| <i>rmpA</i>       | <i>rmpA</i> -F       | ACTGGGCTACCTCTGCTTCA        | 535                 | [108]     |
|                   | <i>rmpA</i> -R       | CTTGCGATGAGCCATCTTTCA       |                     |           |
| <i>magA</i>       | <i>magA</i> -F       | GGTGCTCTTTACATCATTGC        | 1283                | [108]     |
|                   | <i>magA</i> -R       | GCAATGGCCATTTCGCTTAG        |                     |           |
| <i>mrkD</i>       | <i>mrkD</i> -F       | CCACCAACTATTCCTCGAA         | 240                 | [110]     |
|                   | <i>mrkD</i> -R       | ATGGAACCCACATCGACATT        |                     |           |
| <i>ybtA</i>       | <i>ybtA</i> -F       | ATGACGGAGTCACCGCAAAC        | 950                 | [110]     |
|                   | <i>ybtA</i> -R       | TTACATCAGCGTTTAAAGG         |                     |           |
| <i>fimH</i>       | <i>fimH</i> -F       | TACTGCTGATGGGCTGGTC         | 640                 | [110]     |
|                   | <i>fimH</i> -R       | GCCGGAGAGGTAATACCCC         |                     |           |
| <i>entB</i>       | <i>entB</i> -F       | ATTCCTCAACTTCTGGGGC         | 371                 | [110]     |
|                   | <i>entB</i> -R       | AGCATCGGTGGCGGTGGTCA        |                     |           |
| K2                | K2-F                 | GACCCGATATTCATACTTGACAGAG   | 641                 | [110]     |
|                   | K2-R                 | CCTGAAGTAAAATCGTAAATAGATGGC |                     |           |
| K5                | K5-F                 | TGGTAGTGATGCTCGCGA          | 280                 | [111]     |
|                   | K5-R                 | CCTGAACCCACCCCAATC          |                     |           |
| K20               | K20-F                | CGGTGCTACAGTGCATCATT        | 741                 | [113]     |
|                   | K20-R                | GTTATACGATGCTCAGTCGC        |                     |           |
| K54               | K54-F                | CATTAGCTCAGTGGTTGGCT        | 881                 | [113]     |
|                   | K54-R                | GCTTGACAAACACCATAGCAG       |                     |           |
| K57               | K57-F                | CTCAGGGCTAGAAGTGTCAT        | 1037                | [113]     |
|                   | K57-R                | CACTAACCCAGAAAGTCGAG        |                     |           |

**Table S3.** The sixty-five *K. pneumoniae* strains with complete genomes used in the phylogenetic tree.

| <i>K. pneumoniae</i> Strain | Source | Collected Date | Serotype | Location       | GenBank Accession No. |
|-----------------------------|--------|----------------|----------|----------------|-----------------------|
| MN-03                       | bovine | 2014           | K22      | USA            | NZ_CP081897.1         |
| AR142_2b                    | cat    | 2018           | KN2      | Switzerland    | NZ_CP039954.1         |
| 18KM1950                    | dog    | 2018           | KL105    | Switzerland    | NZ_CP039936.1         |
| F1                          | human  | 2014           | K47      | China          | NZ_CP026130.1         |
| AJ218                       | human  | 2002           | KUT      | Australia      | NZ_LR130541.1         |
| B31                         | human  | missing        | K19      | missing        | NZ_CP035929.1         |
| KP1677                      | human  | 2015           | K20      | China          | NZ_CP041022.1         |
| LH102-A                     | human  | 2012           | K22      | Laos           | NZ_CP035194.1         |
| 158590                      | human  | 2018-2         | K47      | China          | NZ_CP047649.1         |
| QD23                        | human  | 2015           | K45      | China          | NZ_CP042858.1         |
| BA25665                     | human  | 2019           | K2       | India          | NZ_CP059468.1         |
| N16-03892                   | human  | 2016           | KUT      | Canada         | NZ_CP047271.1         |
| ATCC 43816                  | human  | missing        | KUT      | missing        | NZ_CP064352.1         |
| RIVM_C014073                | human  | 2017           | K24      | Netherlands    | NZ_CP068797.1         |
| IRQBAS102c                  | human  | missing        | K11      | Irap           | NZ_CP071150.1         |
| SB1139                      | human  | 2002           | KUT      | Netherlands    | NZ_CP084859.1         |
| TH12852                     | human  | missing        | KUT      | China          | NZ_CP087122.1         |
| KP29105                     | human  | 2020           | K1       | China          | NZ_CP091061.1         |
| TAKPN-1                     | human  | 2020           | K54      | China          | NZ_CP091650.1         |
| Bio4                        | human  | 2018           | KN2      | Turkey         | CP093850.1            |
| 2N3                         | human  | 2009           | KUT      | China          | NZ_CP025541.3         |
| GSU10-3                     | human  | 2017           | K47      | Japan          | NZ_AP018671.1         |
| KSB1_7F-sc-2280268          | human  | 2015           | KUT      | missing        | NZ_CP031814.1         |
| NFY0065                     | human  | 2014           | K28      | China          | NZ_CP035531.1         |
| NCTC11698                   | human  | 2015           | K3       | missing        | NZ_LR588408.1         |
| LEMB18                      | human  | 2017           | KUT      | UK             | NZ_CP045782.1         |
| Bckp067                     | human  | 2019           | KUT      | China          | NZ_CP050829.1         |
| SB612                       | water  | 2000           | O1:K1    | Netherlands    | NZ_CP084830.1         |
| 74-17                       | human  | 2017           | KUT      | Italy          | NZ_CP042317.1         |
| RHB38-C06                   | human  | 2017           | K6       | UK             | NZ_CP057099.1         |
| KP63                        | human  | 2020           | K64      | China          | NZ_CP077763.1         |
| R32                         | human  | 2021           | K19      | China          | NZ_CP083443.1         |
| M164-1                      | human  | 2018           | KUT      | China          | NZ_CP063992.1         |
| R50                         | rabbit | 2017           | K5       | China          | NZ_CP040363.1         |
| SB617                       | water  | 2000           | KL124    | Netherlands    | NZ_CP084825.1         |
| SB615                       | water  | 1999           | KL124    | Netherlands    | NZ_CP084829.1         |
| AR_0141                     | human  | missing        | K57      | missing        | NZ_CP028953.1         |
| INF078                      | human  | 2015           | KN2      | missing        | NZ_CP032831.1         |
| NCTC11359                   | human  | 2015           | KUT      | United kingdom | NZ_LR133964.1         |
| EC-12536                    | human  | 2019           | K51      | missing        | NZ_LR025099.1         |
| K2606                       | human  | 2012           | K20      | China          | NZ_CP047633.1         |

|                |         |         |       |             |               |
|----------------|---------|---------|-------|-------------|---------------|
| KPN41053       | human   | 2016    | K16   | China       | NZ_CP052036.1 |
| KP20191015     | human   | 2019    | K15   | missing     | NZ_CP051160.1 |
| 16BU137        | human   | 2016    | KUT   | missing     | NZ_CP051161.1 |
| 89-17          | human   | 2017    | KUT   | Italy       | NZ_CP042315.1 |
| RHBSTW-00128   | human   | 2017    | KUT   | UK          | NZ_CP056830.1 |
| S130-1         | human   | 2019    | KUT   | China       | NZ_CP063865.1 |
| JX-CR-hvKP-7   | human   | 2019    | K64   | China       | NZ_CP064223.1 |
| JX-CR-hvKP-9   | human   | 2019    | K64   | China       | NZ_CP064211.1 |
| ZG2017CW 1-1-1 | human   | 2017    | KUT   | China       | NZ_CP065341.1 |
| JX-CR-hvKP-10  | human   | 2018    | K64   | China       | NZ_CP064258.1 |
| JX-CR-hvKP-8   | human   | 2019    | K64   | China       | NZ_CP064217.1 |
| JX-CR-hvKP-11  | human   | 2019    | KUT   | China       | NZ_CP064208.1 |
| ABFQB          | human   | 2015    | K22   | USA         | NZ_CP036438.1 |
| TA6363         | human   | 2016    | K20   | missing     | NZ_AP019665.1 |
| 49210          | human   | missing | K1    | missing     | NZ_CP089024.1 |
| KpWEA1         | human   | 2016    | KUT   | China       | NZ_AP024568.1 |
| SWHIN_114      | human   | 2018    | KUT   | Hong Kong   | NZ_CP055087.1 |
| STIN_79        | human   | 2017    | K54   | Hong Kong   | NZ_CP055003.1 |
| Kp6            | human   | 2015    | KUT   | missing     | NZ_CP082290.1 |
| SB611          | water   | 2000    | KL111 | Netherlands | NZ_CP084843.1 |
| 555            | chicken | 2018    | KL125 | China       | NZ_CP043932.1 |
| ZYST1          | pig     | 2017    | KL110 | China       | NZ_CP031613.1 |
| SWHE3          | human   | 2018    | K62   | Hong Kong   | NZ_CP055061.1 |
| K41            | pig     | 2020    | KUT   | China       | NZ_CP094237.1 |

---

**Table S4.** The identified GIs in the *K. pneumoniae* genomes.

| <i>K. pneumoniae</i><br>Isolate | GI ID | Location   | Scaffold<br>Size (bp) | Start (bp) | End (bp) | CDS<br>Gene | COG<br>Gene |
|---------------------------------|-------|------------|-----------------------|------------|----------|-------------|-------------|
| 7-5-4                           | GI 1  | Scaffold2  | 432753                | 339787     | 349536   | 9           | 9           |
|                                 | GI 2  | Scaffold2  | 432753                | 59860      | 81676    | 21          | 19          |
|                                 | GI 3  | Scaffold3  | 324215                | 246768     | 254874   | 7           | 6           |
|                                 | GI 4  | Scaffold5  | 301401                | 123785     | 141119   | 14          | 14          |
|                                 | GI 5  | Scaffold6  | 296280                | 155929     | 166357   | 15          | 11          |
|                                 | GI 6  | Scaffold7  | 282157                | 210027     | 221984   | 17          | 7           |
|                                 | GI 7  | Scaffold8  | 250732                | 188109     | 195940   | 9           | 9           |
|                                 | GI 8  | Scaffold8  | 250732                | 207234     | 223806   | 12          | 7           |
|                                 | GI 9  | Scaffold8  | 250732                | 236150     | 241954   | 10          | 8           |
|                                 | GI 10 | Scaffold8  | 250732                | 244943     | 248389   | 7           | 4           |
|                                 | GI 11 | Scaffold9  | 244480                | 194447     | 224127   | 34          | 27          |
|                                 | GI 12 | Scaffold9  | 244480                | 232891     | 238915   | 7           | 7           |
|                                 | GI 13 | Scaffold10 | 241143                | 2585       | 47180    | 47          | 32          |
|                                 | GI 14 | Scaffold15 | 178058                | 139007     | 147213   | 11          | 4           |
|                                 | GI 15 | Scaffold16 | 175428                | 37424      | 45691    | 7           | 5           |
|                                 | GI 16 | Scaffold17 | 168697                | 135196     | 143810   | 9           | 8           |
|                                 | GI 17 | Scaffold20 | 111494                | 58142      | 67650    | 9           | 7           |
| 7-10-14                         | GI 1  | Scaffold1  | 460602                | 152376     | 167750   | 13          | 10          |
|                                 | GI 2  | Scaffold1  | 460602                | 192747     | 225949   | 27          | 23          |
|                                 | GI 3  | Scaffold1  | 460602                | 244863     | 254883   | 16          | 9           |
|                                 | GI 4  | Scaffold2  | 382437                | 330434     | 343331   | 14          | 12          |
|                                 | GI 5  | Scaffold4  | 360045                | 106846     | 117570   | 9           | 9           |
|                                 | GI 6  | Scaffold4  | 360045                | 15346      | 45673    | 26          | 24          |
|                                 | GI 7  | Scaffold5  | 351815                | 233798     | 243191   | 10          | 10          |
|                                 | GI 8  | Scaffold27 | 42946                 | 32741      | 40516    | 7           | 4           |
| 7-13-2                          | GI 1  | Scaffold1  | 736977                | 104781     | 113741   | 8           | 8           |
|                                 | GI 2  | Scaffold1  | 736977                | 358360     | 379490   | 21          | 19          |
|                                 | GI 3  | Scaffold2  | 645154                | 394682     | 412023   | 14          | 14          |
|                                 | GI 4  | Scaffold3  | 477586                | 151492     | 184440   | 35          | 26          |
|                                 | GI 5  | Scaffold7  | 301221                | 21487      | 48214    | 25          | 24          |
|                                 | GI 6  | Scaffold9  | 217230                | 193520     | 212882   | 21          | 17          |
|                                 | GI 7  | Scaffold12 | 132361                | 60442      | 74780    | 15          | 11          |
|                                 | GI 8  | Scaffold28 | 25989                 | 9693       | 16319    | 8           | 5           |
| 7-17-8                          | GI 1  | Scaffold2  | 473222                | 231286     | 247698   | 16          | 16          |
|                                 | GI 2  | Scaffold2  | 473222                | 25130      | 46124    | 25          | 17          |
|                                 | GI 3  | Scaffold2  | 473222                | 266070     | 279222   | 9           | 8           |
|                                 | GI 4  | Scaffold3  | 460977                | 47399      | 59446    | 12          | 3           |
|                                 | GI 5  | Scaffold4  | 421210                | 341088     | 363942   | 23          | 21          |
|                                 | GI 6  | Scaffold4  | 421210                | 87549      | 97802    | 9           | 9           |
|                                 | GI 7  | Scaffold5  | 410758                | 241686     | 249882   | 11          | 10          |
|                                 | GI 8  | Scaffold6  | 365567                | 18564      | 43243    | 26          | 23          |
|                                 | GI 9  | Scaffold6  | 365567                | 3647       | 11072    | 7           | 7           |
|                                 | GI 10 | Scaffold7  | 337469                | 85252      | 90471    | 8           | 8           |
|                                 | GI 11 | Scaffold8  | 332908                | 240567     | 283312   | 47          | 33          |
|                                 | GI 12 | Scaffold9  | 299567                | 166248     | 178841   | 15          | 9           |
|                                 | GI 13 | Scaffold9  | 299567                | 45703      | 62418    | 15          | 12          |
|                                 | GI 14 | Scaffold12 | 206470                | 198350     | 204258   | 5           | 5           |
|                                 | GI 15 | Scaffold14 | 109983                | 81272      | 86612    | 8           | 3           |
| 8-1-12-1                        | GI 1  | Scaffold2  | 609221                | 249438     | 258820   | 9           | 9           |
|                                 | GI 2  | Scaffold2  | 609221                | 60590      | 74393    | 16          | 7           |
|                                 | GI 3  | Scaffold3  | 427492                | 19136      | 36739    | 19          | 19          |
|                                 | GI 4  | Scaffold3  | 427492                | 347004     | 368133   | 21          | 19          |
|                                 | GI 5  | Scaffold3  | 427492                | 93338      | 104200   | 9           | 9           |
|                                 | GI 6  | Scaffold4  | 269760                | 38398      | 46229    | 9           | 9           |
|                                 | GI 7  | Scaffold7  | 207876                | 1522       | 13898    | 17          | 10          |
|                                 | GI 8  | Scaffold9  | 182244                | 159775     | 162808   | 8           | 2           |

|          |       |            |         |        |        |    |    |
|----------|-------|------------|---------|--------|--------|----|----|
| 8-2-5-4  | GI 9  | Scaffold9  | 182244  | 171864 | 179868 | 12 | 10 |
|          | GI 10 | Scaffold9  | 182244  | 3225   | 17849  | 12 | 11 |
|          | GI 11 | Scaffold11 | 169042  | 149704 | 165535 | 20 | 19 |
|          | GI 12 | Scaffold13 | 157700  | 2136   | 8395   | 7  | 6  |
|          | GI 13 | Scaffold19 | 120128  | 96233  | 115744 | 19 | 19 |
|          | GI 14 | Scaffold24 | 85775   | 67696  | 72101  | 7  | 5  |
|          | GI 15 | Scaffold28 | 55673   | 1737   | 10262  | 8  | 8  |
|          | GI 16 | Scaffold29 | 54121   | 5582   | 11865  | 7  | 6  |
|          | GI 1  | Scaffold1  | 636683  | 206607 | 219426 | 11 | 9  |
|          | GI 2  | Scaffold1  | 636683  | 551676 | 585628 | 45 | 31 |
|          | GI 3  | Scaffold1  | 636683  | 595042 | 634014 | 32 | 25 |
|          | GI 4  | Scaffold3  | 390132  | 309488 | 332409 | 23 | 21 |
|          | GI 5  | Scaffold3  | 390132  | 58735  | 68796  | 9  | 9  |
|          | GI 6  | Scaffold6  | 318675  | 43690  | 61028  | 12 | 12 |
|          | GI 7  | Scaffold7  | 314071  | 57029  | 74367  | 14 | 14 |
| 8-2-10-5 | GI 8  | Scaffold9  | 220110  | 142820 | 155334 | 16 | 2  |
|          | GI 9  | Scaffold9  | 220110  | 187363 | 203780 | 15 | 15 |
|          | GI 10 | Scaffold13 | 125592  | 84580  | 109357 | 15 | 14 |
|          | GI 11 | Scaffold16 | 106294  | 70327  | 86892  | 10 | 7  |
|          | GI 1  | Scaffold1  | 1044252 | 774060 | 791396 | 14 | 14 |
|          | GI 2  | Scaffold1  | 1044252 | 955105 | 990617 | 25 | 19 |
|          | GI 3  | Scaffold2  | 745848  | 565466 | 579015 | 13 | 13 |
|          | GI 4  | Scaffold2  | 745848  | 734622 | 743007 | 12 | 11 |
|          | GI 5  | Scaffold3  | 636023  | 109198 | 118393 | 8  | 8  |
|          | GI 6  | Scaffold3  | 636023  | 19101  | 43733  | 21 | 19 |
|          | GI 7  | Scaffold3  | 636023  | 357129 | 384338 | 28 | 25 |
|          | GI 8  | Scaffold3  | 636023  | 408988 | 413997 | 7  | 7  |
|          | GI 9  | Scaffold4  | 546665  | 235463 | 248298 | 10 | 8  |
|          | GI 10 | Scaffold4  | 546665  | 661    | 34755  | 33 | 26 |
|          | GI 11 | Scaffold9  | 216588  | 2681   | 36647  | 37 | 28 |
|          | GI 12 | Scaffold20 | 20995   | 14194  | 18002  | 5  | 5  |

**Table S5.** Various functions of the identified GIs in the in the *K. pneumoniae* genomes.

| <i>K. pneumoniae</i><br>Isolate | Related Gene           |                                          |            |                         |             |
|---------------------------------|------------------------|------------------------------------------|------------|-------------------------|-------------|
|                                 | Prophage<br>regulatory | Antibiotic and Heavy<br>Metal Resistance | Virulence  | Conjugative<br>Transfer | Metabolism  |
| 7-5-4                           | GI 5, GI 11            | GI 4                                     | GI 2, GI 4 |                         | GI 17       |
| 7-10-14                         | GI 2, GI 4, GI 8       | GI 7                                     | GI 1       |                         | GI 6, GI 7  |
| 7-13-2                          | GI 5, GI 7             | GI 3, GI 8                               | GI 2, GI 3 |                         | GI 3        |
| 7-17-8                          | GI 1, GI 8             |                                          | GI 5, GI 3 | GI 11                   | GI 5        |
| 8-1-12-1                        | GI 6, GI 11            |                                          | GI 4       |                         | GI 1        |
| 8-2-5-4                         | GI 2,                  | GI 7                                     | GI 3       |                         | GI 7        |
| 8-2-10-5                        | GI 3, GI 11            | GI 1, GI 12                              | GI 7       |                         | GI 1, GI 10 |

**Table S6.** The identified prophages in the *K. pneumoniae* genomes.

| <i>K. pneumoniae</i><br>Isolate | Prophage ID | Location   | Scaffold Size (bp) | Start (bp) | End (bp) | Possible Phage                     | NCBI Accession No. |
|---------------------------------|-------------|------------|--------------------|------------|----------|------------------------------------|--------------------|
| 7-5-4                           | Ph01        | Scaffold6  | 296280             | 149191     | 187586   | <i>Enterobacteria</i> _phage_186   | NC_001317          |
|                                 | Ph02        | Scaffold8  | 250732             | 203517     | 250731   | <i>Pseudomonas</i> _phage_D3       | NC_002484          |
| 7-10-14                         | Ph01        | Scaffold1  | 460602             | 208039     | 271213   | <i>Pseudomonas</i> _phage_D3       | NC_002484          |
|                                 | Ph02        | Scaffold1  | 460602             | 380887     | 416860   | <i>Enterobacteria</i> _phage_P2    | NC_001895          |
| 7-13-2                          | Ph01        | Scaffold12 | 132361             | 58921      | 91462    | Phage_phiO18P                      | NC_009542          |
|                                 | Ph02        | Scaffold3  | 477586             | 167679     | 204848   | <i>Enterobacteria</i> _phage_ES18  | NC_006949          |
| 7-17-8                          | Ph01        | Scaffold2  | 473222             | 27482      | 73299    | <i>Klebsiella</i> _phage_phiKO2    | NC_005857          |
|                                 | Ph02        | Scaffold14 | 109983             | 1015       | 109982   | <i>Enterobacteria</i> _phage_P1    | NC_005856          |
| 8-1-12-1                        | Ph01        | Scaffold11 | 169042             | 147704     | 169042   | <i>Enterobacteria</i> _phage_186   | NC_001317          |
|                                 | Ph02        | Scaffold9  | 182244             | 154869     | 182244   | <i>Ralstonia</i> _phage_RSA1       | NC_009382          |
|                                 | Ph03        | Scaffold4  | 269760             | 198579     | 249652   | <i>Klebsiella</i> _phage_phiKO2    | NC_005857          |
| 8-2-5-4                         | Ph01        | Scaffold1  | 636683             | 556279     | 599619   | <i>Enterobacteria</i> _phage_HK022 | NC_002166          |
| 8-2-10-5                        | Ph01        | Scaffold9  | 216588             | 6585       | 40967    | <i>Enterobacteria</i> _phage_N15   | NC_001901          |
|                                 | Ph02        | Scaffold1  | 53616              | 3208       | 53418    | <i>Klebsiella</i> _phage_phiKO2    | NC_005857          |

**Table S7.** The identified INs in the *K. pneumoniae* genomes.

| <i>K. pneumoniae</i><br>Isolate | IN ID | Location   | Scaffold<br>Size (bp) | Start (bp) | End (bp) | CDS<br>Gene |
|---------------------------------|-------|------------|-----------------------|------------|----------|-------------|
| 7-5-4                           | IN 1  | Scaffold43 | 5287                  | 1829       | 5286     | 1           |
| 7-10-14                         | IN 1  | Scaffold66 | 1899                  | 34         | 1864     | 2           |
|                                 | IN 2  | Scaffold76 | 1265                  | 3          | 1232     | 0           |
| 8-2-10-5                        | IN 1  | Scaffold1  | 1044252               | 318724     | 323056   | 2           |

**Table S8.** The identified ISs in the *K. pneumoniae* genomes.

| <i>K. pneumoniae</i><br>Isolate | IS ID | Location   | Scaffold<br>Size (bp) | Start<br>(bp) | End<br>(bp) | IS Family |
|---------------------------------|-------|------------|-----------------------|---------------|-------------|-----------|
| 7-5-4                           | IS001 | Scaffold52 | 3429                  | 2043          | 3359        | IS110     |
|                                 | IS002 | Scaffold9  | 244480                | 226072        | 227233      | IS3       |
| 7-10-14                         | IS001 | Scaffold42 | 8805                  | 6302          | 7043        | IS3       |
|                                 | IS002 | Scaffold5  | 351815                | 276447        | 277895      | IS91      |
| 7-13-2                          | IS001 | Scaffold1  | 736977                | 371640        | 372447      | IS91      |
|                                 | IS002 | Scaffold17 | 90033                 | 189           | 1454        | IS110     |
|                                 | IS003 | Scaffold21 | 50695                 | 42679         | 43840       | IS3       |
|                                 | IS004 | Scaffold25 | 27431                 | 26176         | 27349       | IS5       |
|                                 | IS005 | Scaffold57 | 1258                  | 1             | 1258        | IS3       |
|                                 | IS006 | Scaffold66 | 820                   | 1             | 820         | IS6       |
| 7-17-8                          | IS001 | Scaffold2  | 473222                | 279350        | 280531      | IS3       |
|                                 | IS002 | Scaffold4  | 421210                | 354404        | 355181      | IS91      |
| 8-1-12-1                        | IS001 | Scaffold2  | 609221                | 63591         | 65027       | IS91      |
|                                 | IS002 | Scaffold27 | 58708                 | 55130         | 56718       | IS3       |
|                                 | IS003 | Scaffold3  | 427492                | 360319        | 361096      | IS91      |
|                                 | IS004 | Scaffold30 | 44634                 | 37645         | 38824       | IS5       |
| 8-2-5-4                         | IS003 | Scaffold1  | 636683                | 224411        | 225631      | IS3       |
|                                 | IS001 | Scaffold13 | 125592                | 106372        | 107533      | IS3       |
|                                 | IS002 | Scaffold13 | 125592                | 113920        | 115084      | IS3       |
|                                 | IS004 | Scaffold3  | 390132                | 322874        | 323651      | IS91      |
| 8-2-10-5                        | IS001 | Scaffold3  | 636023                | 374276        | 375378      | IS91      |
|                                 | IS002 | Scaffold3  | 636023                | 375309        | 376585      | IS91      |



**Table S9.** The identified repeats in the *K. pneumoniae* genomes

| <i>K. pneumoniae</i><br>Isolate | Repeat ID        | Location   | Scaffold Size (bp) | Repeat |        |             |
|---------------------------------|------------------|------------|--------------------|--------|--------|-------------|
|                                 |                  |            |                    | Start  | End    | Length (bp) |
| 7-5-4                           | Scaffold14_TR056 | Scaffold14 | 196754             | 1      | 522    | 522         |
| 7-10-14                         | Scaffold3_TR004  | Scaffold3  | 379227             | 1      | 223    | 223         |
|                                 | Scaffold6_TR014  | Scaffold6  | 341057             | 1      | 270    | 270         |
|                                 | Scaffold7_TR022  | Scaffold7  | 295176             | 1      | 447    | 447         |
|                                 | Scaffold15_TR051 | Scaffold15 | 130236             | 129760 | 130236 | 477         |
|                                 | Scaffold32_TR069 | Scaffold32 | 29415              | 1      | 267    | 267         |
| 7-13-2                          | Scaffold16_TR051 | Scaffold16 | 95537              | 1      | 554    | 554         |
|                                 | Scaffold22_TR061 | Scaffold22 | 48713              | 48189  | 48713  | 525         |
| 7-17-8                          | Scaffold24_TR60  | Scaffold24 | 25052              | 1      | 341    | 341         |
| 8-2-5-4                         | Scaffold7_TR035  | Scaffold7  | 314071             | 1      | 305    | 305         |
|                                 | Scaffold16_TR067 | Scaffold16 | 106294             | 106184 | 106294 | 111         |
|                                 | Scaffold31_TR071 | Scaffold31 | 25321              | 1      | 883    | 883         |
| 8-2-10-5                        | Scaffold36_TR074 | Scaffold36 | 6671               | 1      | 98     | 98          |
|                                 | Scaffold6_TR38   | Scaffold6  | 322274             | 322215 | 322274 | 60          |
|                                 | Scaffold8_TR50   | Scaffold8  | 277101             | 276823 | 277101 | 279         |
|                                 | Scaffold19_TR63  | Scaffold19 | 22479              | 1      | 85     | 85          |
|                                 |                  |            |                    |        |        |             |

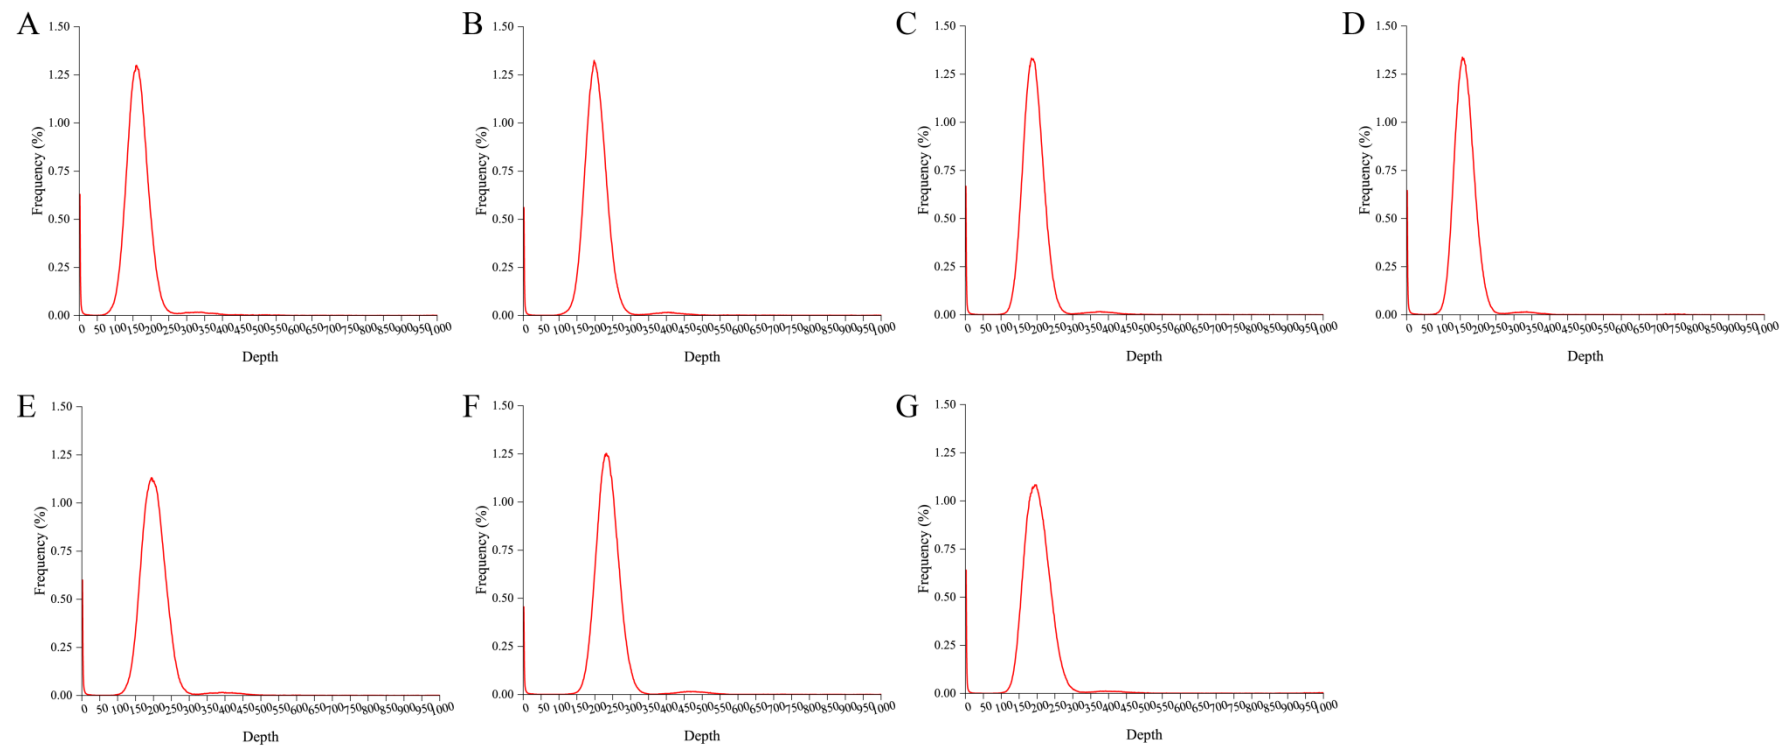

**Figure S1.** The k-mer analysis for *K. pneumoniae* subread data based on the number of unique 17-mers.(A–G): *K. pneumoniae* 7-5-4, 7-10-14, 7-13-2, 7-17-8, 8-1-12-1, 8-2-5-4, and 8-2-10-5, respectively.

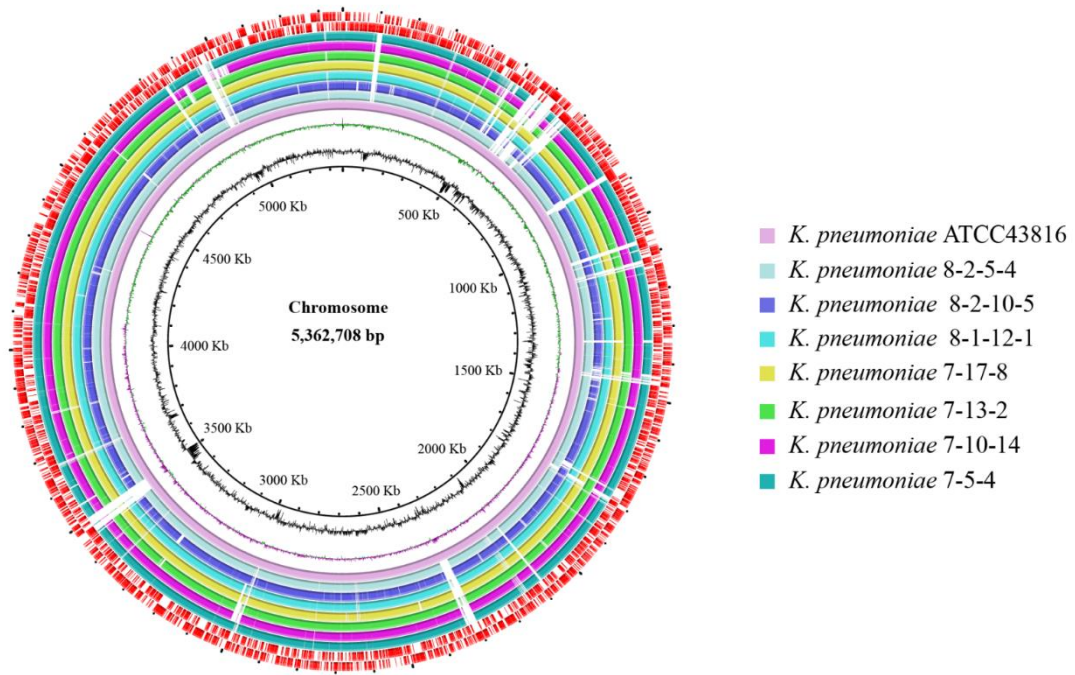

**Figure S2.** Genome circle maps of the seven *K. pneumoniae* isolates. Circles from the inwards to outside represented GC content (outward parts mean higher than average, while inward parts mean lower than average); GC-skew (purple values are higher than zero, while green values are lower than zero); the reference genome of *K. pneumoniae* ATCC43816 (GenBank accession no. NZ\_CP064352); *K. pneumoniae* 8-2-5-4, 8-2-10-5, 8-1-12-1, 7-17-8, 7-13-2, 7-10-14, and 7-5-4 genomes, respectively; and CDSs on the negative and positive chains (inward and outward parts), respectively.
